# Supplementary material for: Genetic variant in 3’ untranslated region of the mouse pycard gene regulates inflammasome activity
Source: eLife journal article supplement (doi:10.7554/elife.68203), 2021-07-01
Supplement: data1 [file Figure 1 source data.xlsx]

## Sheet: Figure 1
Data used to generate figures:
Figure 1A data: Il1b ng/mg cell protein
Sample	IL-1B (pg/mL)	pg IL-1B sample	protein assayed (ug)	protein total (ug)	ng IL-1B/ mgprotein	size dish
AKR 1	16.615	332.3	32.475	405.938	0.818599	6 well
DBA 1	15.681	313.62	31.979	399.738	0.784565	6 well
AKR LPS 1	35.728	71.456	1.42	5.325	13.419	96 well
AKR LPS 2	29.487	58.974	1.028	3.855	15.2981	96 well
AKR LPS 3	21.087	42.174	1.527	5.72625	7.36503	96 well
DBA LPS 1	69.261	138.522	1.558	5.8425	23.7094	96 well
DBA LPS 2	56.502	113.004	1.109	4.15875	27.1726	96 well
DBA LPS 3	49.315	98.63	1.198	4.4925	21.9544	96 well
Figure 1D data: IL1b ng/mg cell protein			Log10 values used
AA	AD	DD	AA	AD			IL-1b ELISA and proten assays for F4 BMDM used for QTL analysis and Fig 1D.
12.7	16.9	59.6	1.1038	1.22789			Sample	IL-1B (pg/mL)	pg IL-1B assayed	pg IL-1B sample	protein assayed (ug)	protein total (ug)	ng IL-1B/mg protein
33.9	20.2	16.5	1.5302	1.30535	DD		1	340.626	17.0313	681.252	3.05	11.4375	59.563
5.3	7.9	24.2	0.724276	0.897627	1.77525		2
7.9	37.8	43	0.897627	1.57749	1.21748		3	84.974	4.2487	169.948	2.754	10.3275	16.4559
13.8	52.7	20	1.13988	1.72181	1.38382		4	71.822	3.5911	143.644	1.581	5.92875	24.2284
20.9	51.4	17.9	1.32015	1.71096	1.63347		5	63.941	3.19705	127.882	2.019	7.57125	16.8905
10.9	12.7	28.5	1.03743	1.1038	1.30103		6	70.444	3.5222	140.888	1.856	6.96	20.2425
9.7	19.1	16.1	0.986772	1.28103	1.25285		7	61.629	3.08145	123.258	2.589	9.70875	12.6956
13.5	20.3	9.9	1.13033	1.3075	1.45484		8	46.401	2.32005	92.802	3.14	11.775	7.88127
19.9	7.3	22.5	1.29885	0.863323	1.20683		9	145.625	7.28125	291.25	2.054	7.7025	37.8124
7.8	6.6	39.6	0.892095	0.819544	0.995635		10	164.656	8.2328	329.312	1.666	6.2475	52.711
8.2	13.1	40.7	0.913814	1.11727	1.35218		11	103.568	5.1784	207.136	1.074	4.0275	51.4304
9.3	19.4	34.5	0.968483	1.2878	1.5977		12	59.26	2.963	118.52	0.933	3.49875	33.875
2.9	14	20.1	0.462398	1.14613	1.60959		13	62.876	3.1438	125.752	0.779	2.92125	43.0473
14.1	31.4	19.4	1.14922	1.49693	1.53782		14	61.538	3.0769	123.076	2.58	9.675	12.721
11.8	3	74.9	1.07188	0.477121	1.3032		15	60.171	3.00855	120.342	1.683	6.31125	19.0679
8.3	19.7	47.4	0.919078	1.29447	1.2878		16	33.639	1.68195	67.278	0.897	3.36375	20.0009
4.1	17.3	13.1	0.612784	1.23805	1.87448		17	53.146	2.6573	106.292	1.396	5.235	20.3041
10.4	23.1	36.5	1.01703	1.36361	1.67578		18	8.194	0.4097	16.388	0.597	2.23875	7.32016
7.8	10	26.5	0.892095	1	1.11727		19	9.099	0.45495	18.198	0.921	3.45375	5.26906
12.7	14.9	42.7	1.1038	1.17319	1.56229		20	18.09	0.9045	36.18	1.462	5.4825	6.59918
16.6	15.6		1.22011	1.19312	1.42325		21	37.989	1.89945	75.978	1.55	5.8125	13.0715
14.9	9.8	21	1.17319	0.991226	1.63043		22	80.894	4.0447	161.788	2.224	8.34	19.399
7.6	10.7	21.9	0.880814	1.02938			23	20.178	1.0089	40.356	1.37	5.1375	7.85518
11.4	12.4	49.2	1.0569	1.09342	1.32222		24	24.6	1.23	49.2	0.952	3.57	13.7815
10.7	27.2	14.7	1.02938	1.43457	1.34044		25	77.657	3.88285	155.314	1.979	7.42125	20.9283
13.4	16	32.2	1.1271	1.20412	1.69197		26	78.858	3.9429	157.716	2.353	8.82375	17.874
17.1	9	21.9	1.233	0.954243	1.16732		27	111.231	5.56155	222.462	2.081	7.80375	28.5071
22.5	15.1	16.6	1.35218	1.17898	1.50786		28	53.116	2.6558	106.232	2.029	7.60875	13.9618
10.6	11.7	53.9	1.02531	1.06819	1.34044		29	24.423	1.22115	48.846	0.807	3.02625	16.1408
	19.2	35.3		1.2833	1.22011		30	16.24	0.812	32.48	0.871	3.26625	9.94413
	13	43.4		1.11394	1.73159		31	36.557	1.82785	73.114	1.783	6.68625	10.935
	7.1	13		0.851258	1.54777		32	18.619	0.93095	37.238	1.029	3.85875	9.65028
	24.4	65.8		1.38739	1.63749		33	37.72	1.886	75.44	0.641	2.40375	31.3843
	25.5			1.40654	1.11394		34	25.694	1.2847	51.388	4.572	17.145	2.99726
	13.2	23.8		1.12057	1.81823		35	28.979	1.44895	57.958	1.149	4.30875	13.4512
	24.2	23.8		1.38382			36	57.35	2.8675	114.7	1.553	5.82375	19.6952
	38.2	40.9		1.58206	1.37658		37	41.275	2.06375	82.55	0.978	3.6675	22.5085
	19.6	38.2		1.29226	1.37658		38	59.624	2.9812	119.248	0.803	3.01125	39.6008
	8	22.2		0.90309	1.61172		39	31.262	1.5631	62.524	0.41	1.5375	40.666
	18.2	5.1		1.26007	1.58206		40	22.151	1.10755	44.302	0.593	2.22375	19.9222
	31			1.49136	1.34635		41	14.978	0.7489	29.956	1.029	3.85875	7.76314
	28.6			1.45637	0.70757		42	15.154	0.7577	30.308	0.466	1.7475	17.3436
	10.9			1.03743			43	95.547	4.77735	191.094	1.477	5.53875	34.5013
	15.4			1.18752			44	47.573	2.37865	95.146	1.26	4.725	20.1367
	34.4			1.53656			45	17.12	0.856	34.24	1.12	4.2	8.15238
	11.6			1.06446			46	57.38	2.869	114.76	1.58	5.925	19.3688
	8.4			0.924279			47	75.166	3.7583	150.332	0.535	2.00625	74.9318
	25.6			1.40824			48	33.699	1.68495	67.398	0.779	2.92125	23.0716
	9			0.954243			49	20.943	1.04715	41.886	1.122	4.2075	9.95508
							50	22.712	1.1356	45.424	0.815	3.05625	14.8627
							51	8.69	0.4345	17.38	0.496	1.86	9.34409
							52	26.669	1.33345	53.338	0.91	3.4125	15.6302
							53	12.811	0.64055	25.622	0.696	2.61	9.81686
							54	28.771	1.43855	57.542	0.324	1.215	47.3597
							55	23.508	1.1754	47.016	1.167	4.37625	10.7434
							56	32.124	1.6062	64.248	1.307	4.90125	13.1085
							57	27.587	1.37935	55.174	0.403	1.51125	36.5089
							58	24.364	1.2182	48.728	1.045	3.91875	12.4346
							59	42.053	2.10265	84.106	0.847	3.17625	26.4797
							60	22.829	1.14145	45.658	4.234	15.8775	2.87564
							61	43.731	2.18655	87.462	0.856	3.21	27.2467
							62	150.354	7.5177	300.708	1.876	7.035	42.7446
							63
							64	67.875	3.39375	135.75	1.726	6.4725	20.9733
							65	24.364	1.2182	48.728	0.593	2.22375	21.9125
							66	117.955	5.89775	235.91	1.278	4.7925	49.2248
							67	21.385	1.06925	42.77	0.775	2.90625	14.7166
							68	31.886	1.5943	63.772	1.066	3.9975	15.953
							69	21.267	1.06335	42.534	1.256	4.71	9.03057
							70	47.302	2.3651	94.604	1.671	6.26625	15.0974
							71	57.017	2.85085	114.034	2.163	8.11125	14.0587
							72	57.956	2.8978	115.912	2.626	9.8475	11.7707
							73	52.905	2.64525	105.81	2.415	9.05625	11.6836
							74	155.299	7.76495	310.598	2.573	9.64875	32.1905
							75	101.276	5.0638	202.552	2.813	10.5488	19.2015
							76	32.926	1.6463	65.852	0.803	3.01125	21.8687
							77	47.122	2.3561	94.244	1.936	7.26	12.9813
							78	22.682	1.1341	45.364	1.461	5.47875	8.27999
							79	16.269	0.81345	32.538	2.1	7.875	4.13181
							80	29.216	1.4608	58.432	1.498	5.6175	10.4018
							81	71.374	3.5687	142.748	2.292	8.595	16.6083
							82	26.363	1.31815	52.726	1.992	7.47	7.05837
							83	77.931	3.89655	155.862	1.703	6.38625	24.4059
							84	236.71	11.8355	473.42	2.344	8.79	53.8589
							85	45.484	2.2742	90.968	3.093	11.5987	7.84291
							86	40.585	2.02925	81.17	0.85	3.1875	25.4651
							87	89.931	4.49655	179.862	1.359	5.09625	35.293
							88	45.456	2.2728	90.912	0.558	2.0925	43.4466
							89	50.482	2.5241	100.964	2.112	7.92	12.748
							90	44.985	2.24925	89.97	1.812	6.795	13.2406
							91	94.42	4.721	188.84	2.078	7.7925	24.2336
							92	61.06	3.053	122.12	2.511	9.41625	12.9691
							93	119.517	5.97585	239.034	1.668	6.255	38.2149
							94	23.518	1.1759	47.036	0.64	2.4	19.5983
							95	29.076	1.4538	58.152	0.933	3.49875	16.6208
							96	232.316	11.6158	464.632	1.883	7.06125	65.8002
							97
							98	58.961	2.94805	117.922	1.324	4.965	23.7507
							99	59.773	2.98865	119.546	2.135	8.00625	14.9316
							100	27.02	1.351	54.04	1.802	6.7575	7.99704
							101	75.158	3.7579	150.316	2.205	8.26875	18.1788
							102	111.876	5.5938	223.752	1.926	7.2225	30.9799
							103	67.825	3.39125	135.65	1.267	4.75125	28.5504
							104	50.816	2.5408	101.632	2.479	9.29625	10.9326
							105	15.802	0.7901	31.604	1.114	4.1775	7.56529
							106	45.068	2.2534	90.136	2.106	7.8975	11.4132
							107	35.811	1.79055	71.622	1.788	6.705	10.6819
							108	27.842	1.3921	55.684	1.112	4.17	13.3535
							109	63.219	3.16095	126.438	2.196	8.235	15.3537
							110	48.425	2.42125	96.85	1.509	5.65875	17.1151
							111	76.968	3.8484	153.936	1.193	4.47375	34.4087
							112	99.21	4.9605	198.42	2.227	8.35125	23.7593
							113	23.217	1.16085	46.434	1.067	4.00125	11.6049
							114	34.792	1.7396	69.584	0.826	3.0975	22.4646
							115	12.975	0.64875	25.95	0.821	3.07875	8.42875
							116	15.611	0.78055	31.222	0.787	2.95125	10.5792
							117	33.966	1.6983	67.932	0.443	1.66125	40.8921
							118	34.379	1.71895	68.758	0.717	2.68875	25.5725
							119	56.977	2.84885	113.954	0.795	2.98125	38.2236
							120	73.971	3.69855	147.942	1.775	6.65625	22.226
							121	41.58	2.079	83.16	4.379	16.4212	5.06417
							122	14.035	0.70175	28.07	0.834	3.1275	8.97522
