# Supplementary material for: Genetic variant in 3’ untranslated region of the mouse pycard gene regulates inflammasome activity
Source: eLife journal article supplement (doi:10.7554/elife.68203), 2021-07-01
Supplement: data1 [file Figure 2 source data.xlsx]

## Sheet: Figure 2
Figure 2A Relative Pycard mRNA levels based on qPCR							not shown replicate for strain effect on Pycard mRNA by qPCR
AKR	AKR+LPS	DBA/2	DBA/2+LPS		could not locate qPCR data		Zero Time (Untreated) Analysis
1	0.95	2.06	1.85				biological triplicates of tecnhical triplicates				AKR avg ∆Ct
1.04	1.09	1.81	3.16					ΔΔCt-with average untreated AKR as calibrator	2^-ΔΔCt		7.91626
0.96	1.15	2.14	1.97				AKR 0-1	0	1
							AKR 0-2	-0.0233059	1.01629		Fold difference:	2.70874
							AKR 0-3	0.0188936	0.986989
Figure 2B ACS western blot densitometry scan							DBA 0-1	-1.75112	3.36619
Band No	B-ACTIN 0126 Volume	ASC	ASC/b-actin ratio				DBA 0-2	-1.26729	2.4071
AKR 1	93086110	67374095	0.723782				DBA 0-3	-1.23989	2.36181
AKR 2	72917492	61948083	0.849564
AKR3	76769627	55849503	0.727495
DBA 1	77021152	96129411	1.24809
DBA 2	96262574	103610462	1.07633
DBA 3	97751382	111916662	1.14491
	Unedited western blot for ASC staining Fig 2B				Unedited western blot for b-actin staining Fig 2B
