# Supplementary material for: Genetic variant in 3’ untranslated region of the mouse pycard gene regulates inflammasome activity
Source: eLife journal article supplement (doi:10.7554/elife.68203), 2021-07-01
Supplement: data1 [file Figure 3 source data.xlsx]

## Sheet: Figure 3
Figure 3A Pycard qPCR
											ave time 0	1.00109	AKR % remaining
Sample Name	Target Name	Reporter	Cт	Sample Name	Target Name	Reporter	Cт	DeltaCt	Avg DeltaCt	ΔΔCt-with zero time point as calibrator	2^-ΔΔCt	Median DeltaCT		ΔΔCt-with zero time point as calibrator	2^-ΔΔCt	ΔΔCt-with zero time point as calibrator
AKR 0-1	pycard	FAM	23.929	AKR 0-1	actb	VIC	16.1595	7.76946
AKR 0-1	pycard	FAM	24.2615	AKR 0-1	actb	VIC	16.0923	8.16918	7.91774	0	1	7.81456	99.891	0	1	107.56
AKR 0-1	pycard	FAM	23.9655	AKR 0-1	actb	VIC	16.1509	7.81456
AKR 0-2	pycard	FAM	23.8365	AKR 0-2	actb	VIC	16.2639	7.57256
AKR 0-2	pycard	FAM	24.0144	AKR 0-2	actb	VIC	15.9887	8.02573	7.89443	-0.0233059	1.01629	8.02573	101.518	0.211171	0.863836	92.9145
AKR 0-2	pycard	FAM	24.0603	AKR 0-2	actb	VIC	15.9753	8.08499
AKR 0-3	pycard	FAM	23.7258	AKR 0-3	actb	VIC	15.8387	7.88714
AKR 0-3	pycard	FAM	23.829	AKR 0-3	actb	VIC	15.9024	7.92658	7.93663	0.0188936	0.986989	7.92658	98.5913	0.112015	0.925295	99.5251
AKR 0-3	pycard	FAM	23.8652	AKR 0-3	actb	VIC	15.869	7.99617
AKR 4-1	pycard	FAM	28.5282	AKR 4-1	actb	VIC	15.931	12.5972
AKR 4-1	pycard	FAM	28.3934	AKR 4-1	actb	VIC	15.8105	12.5829	12.4404	4.52267	0.0435053	12.5829	4.34578	4.7683	0.0366942	3.94684
AKR 4-1	pycard	FAM	28.1613	AKR 4-1	actb	VIC	16.0201	12.1411
AKR 4-2	pycard	FAM	27.1429	AKR 4-2	actb	VIC	15.981	11.1619
AKR 4-2	pycard	FAM	27.3517	AKR 4-2	actb	VIC	15.9071	11.4446	11.3266	3.4089	0.09415	11.3734	9.40473	3.55881	0.0848579	9.12735
AKR 4-2	pycard	FAM	27.2335	AKR 4-2	actb	VIC	15.8602	11.3734
AKR 4-3	pycard	FAM	26.3174	AKR 4-3	actb	VIC	15.9614	10.356
AKR 4-3	pycard	FAM	26.2708	AKR 4-3	actb	VIC	15.7283	10.5426	10.5198	2.60202	0.164708	10.5426	16.4528	2.72801	0.150934	16.2345
AKR 4-3	pycard	FAM	26.5399	AKR 4-3	actb	VIC	15.8793	10.6607
AKR 8-1	pycard	FAM	32.1698	AKR 8-1	actb	VIC	15.9325	16.2373
AKR 8-1	pycard	FAM	33.3713	AKR 8-1	actb	VIC	15.837	17.5343	16.7155	8.79779	0.00224698	16.3749	0.224453	8.56037	0.00264895	0.284922
AKR 8-1	pycard	FAM	32.3593	AKR 8-1	actb	VIC	15.9844	16.3749
AKR 8-2	pycard	FAM	32.0669	AKR 8-2	actb	VIC	15.9419	16.125
AKR 8-2	pycard	FAM	31.9505	AKR 8-2	actb	VIC	15.735	16.2155	16.1777	8.25998	0.0032621	16.1926	0.325855	8.37805	0.00300576	0.323301
AKR 8-2	pycard	FAM	32.0531	AKR 8-2	actb	VIC	15.8605	16.1926
AKR 8-3	pycard	FAM	29.556	AKR 8-3	actb	VIC	15.7158	13.8402
AKR 8-3	pycard	FAM	30.0687	AKR 8-3	actb	VIC	15.6995	14.3693	14.1211	6.2034	0.0135704	14.154	1.35556	6.33939	0.0123496	1.32833
AKR 8-3	pycard	FAM	29.9116	AKR 8-3	actb	VIC	15.7576	14.154
														ΔΔCt-with zero time point as calibrator	2^-ΔΔCt	ΔΔCt-with zero time point as calibrator
DBA 0-1	pycard	FAM	22.4092	DBA 0-1	actb	VIC	16.276	6.13316			ave time 0	2.71447	DBA/2 % remaining
DBA 0-1	pycard	FAM	22.5062	DBA 0-1	actb	VIC	16.145	6.36121	6.16515	-1.75259	3.36963	6.13316	124.136	-0.565284	1.47968	126.905
DBA 0-1	pycard	FAM	22.4646	DBA 0-1	actb	VIC	16.4635	6.00107
DBA 0-2	pycard	FAM	22.4887	DBA 0-2	actb	VIC	16.0169	6.47178
DBA 0-2	pycard	FAM	22.7659	DBA 0-2	actb	VIC	15.9893	6.77669	6.64897	-1.26877	2.40955	6.69845	88.7671	0	1	85.7651
DBA 0-2	pycard	FAM	22.5838	DBA 0-2	actb	VIC	15.8854	6.69845
DBA 0-3	pycard	FAM	22.5758	DBA 0-3	actb	VIC	15.9035	6.67236
DBA 0-3	pycard	FAM	22.501	DBA 0-3	actb	VIC	15.8939	6.60714	6.67637	-1.24136	2.36422	6.67236	87.0971	-0.0260897	1.01825	87.3302
DBA 0-3	pycard	FAM	22.5793	DBA 0-3	actb	VIC	15.8297	6.74961
DBA 4-1	pycard	FAM	24.6071	DBA 4-1	actb	VIC	15.7479	8.85919
DBA 4-1	pycard	FAM	24.1051	DBA 4-1	actb	VIC	15.6382	8.46685	8.62015	0.702417	0.614542	8.53442	22.6395	1.83597	0.280102	24.023
DBA 4-1	pycard	FAM	24.2698	DBA 4-1	actb	VIC	15.7353	8.53442
DBA 4-2	pycard	FAM	25.4082	DBA 4-2	actb	VIC	16.0135	9.39471
DBA 4-2	pycard	FAM	25.7765	DBA 4-2	actb	VIC	16.0369	9.73957	9.56484	1.64711	0.31928	9.56025	11.7622	2.86181	0.137566	11.7983
DBA 4-2	pycard	FAM	25.5877	DBA 4-2	actb	VIC	16.0274	9.56025
DBA 4-3	pycard	FAM	24.4051	DBA 4-3	actb	VIC	15.6844	8.72071
DBA 4-3	pycard	FAM	24.3025	DBA 4-3	actb	VIC	15.721	8.58147	8.6652	0.747467	0.595648	8.69342	21.9435	1.99498	0.250872	21.516
DBA 4-3	pycard	FAM	24.2723	DBA 4-3	actb	VIC	15.5788	8.69342
DBA 8-1	pycard	FAM	26.525	DBA 8-1	actb	VIC	15.837	10.688
DBA 8-1	pycard	FAM	26.3422	DBA 8-1	actb	VIC	15.7353	10.607	10.5026	2.58485	0.16668	10.607	6.14042	3.90855	0.0665902	5.71112
DBA 8-1	pycard	FAM	26.157	DBA 8-1	actb	VIC	15.9442	10.2128
DBA 8-2	pycard	FAM	26.5149	DBA 8-2	actb	VIC	15.8719	10.6431
DBA 8-2	pycard	FAM	26.6688	DBA 8-2	actb	VIC	15.6162	11.0526	10.8539	2.93621	0.130651	10.8661	4.81313	4.1677	0.0556414	4.77209
DBA 8-2	pycard	FAM	26.6017	DBA 8-2	actb	VIC	15.7356	10.8661
DBA 8-3	pycard	FAM	26.4687	DBA 8-3	actb	VIC	15.7062	10.7626
DBA 8-3	pycard	FAM	26.1446	DBA 8-3	actb	VIC	15.6573	10.4873	10.6653	2.74757	0.148901	10.746	5.48547	4.04759	0.0604721	5.18639
DBA 8-3	pycard	FAM	26.3774	DBA 8-3	actb	VIC	15.6314	10.746
Figure 3B Nuclear run on assay for Pycard transcription, qPCR
Well	Sample Name	Target Name	Task	Reporter	Quencher	RQ	RQ Min	RQ Max	Cт	Cт Mean	Cт SD	ΔCт	ddCT vs higest DBA	mean	2^-ddCT
A1	AKR-1	pycard	UNKNOWN	FAM	NFQ-MGB	1	0.583906	1.7126	36.4681	36.2853	0.298053	2.86694	-0.498001		1.41226
A1	AKR-1	actb	UNKNOWN	VIC	NFQ-MGB				33.6012	33.3916	0.190923
A2	AKR-2	pycard	UNKNOWN	FAM	NFQ-MGB	1	0.583906	1.7126	35.9413	36.2853	0.298053	2.59546	-0.769485		1.70466
A2	AKR-2	actb	UNKNOWN	VIC	NFQ-MGB				33.3459	33.3916	0.190923
A3	AKR-3	pycard	UNKNOWN	FAM	NFQ-MGB	1	0.583906	1.7126	36.4463	36.2853	0.298053	3.21866	-0.146286		1.10672
A3	AKR-3	actb	UNKNOWN	VIC	NFQ-MGB				33.2276	33.3916	0.190923
B1	DBA-1	pycard	UNKNOWN	FAM	NFQ-MGB	0.721336	0.286852	1.81392	36.549	36.547	0.00282418	3.26024	-0.104702	0	1
B1	DBA-1	actb	UNKNOWN	VIC	NFQ-MGB				33.2887	33.2026	0.112489
B3	DBA-1	pycard	UNKNOWN	FAM	NFQ-MGB	0.721336	0.286852	1.81392	36.545	36.547	0.00282418	3.46965	0.104702
B3	DBA-1	actb	UNKNOWN	VIC	NFQ-MGB				33.0753	33.2026	0.112489
B4	DBA-2	pycard	UNKNOWN	FAM	NFQ-MGB	1.09292	0.0611866	19.5218	36.6398	36.8502	0.297566	2.43819	-0.92675	-0.599443	1.51513
B4	DBA-2	actb	UNKNOWN	VIC	NFQ-MGB				34.2016	34.1586	0.173361
B5	DBA-2	actb	UNKNOWN	VIC	NFQ-MGB				33.9678	34.1586	0.173361
B5	DBA-2	pycard	UNKNOWN	FAM	NFQ-MGB	1.09292	0.0611866	19.5218	37.0606	36.8502	0.297566	3.09281	-0.272137
B7	DBA-3	actb	UNKNOWN	VIC	NFQ-MGB				33.3194	33.4157	0.0933736
B8	DBA-3	pycard	UNKNOWN	FAM	NFQ-MGB	0.737926			36.8379	36.8379		3.33214	-0.0328064	-0.0328064	1.023
B9	DBA-3	actb	UNKNOWN	VIC	NFQ-MGB				33.422	33.4157	0.0933736
