# Supplementary figures and images for: Genetic variant in 3’ untranslated region of the mouse pycard gene regulates inflammasome activity
Source: eLife journal article supplement (doi:10.7554/elife.68203), 2021-07-01

Unedited western blots for Figure 2B. A. ASC western blot. B. -actin western blot.

A.


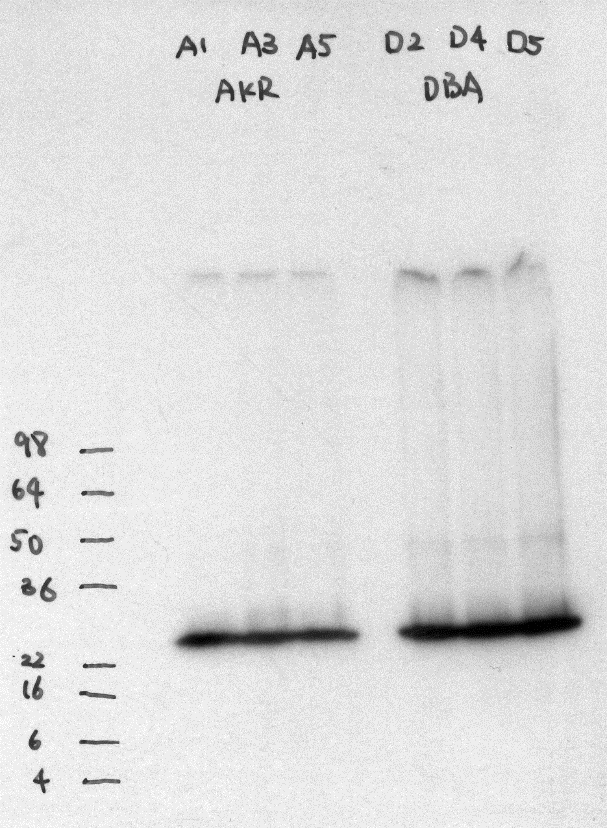


B.


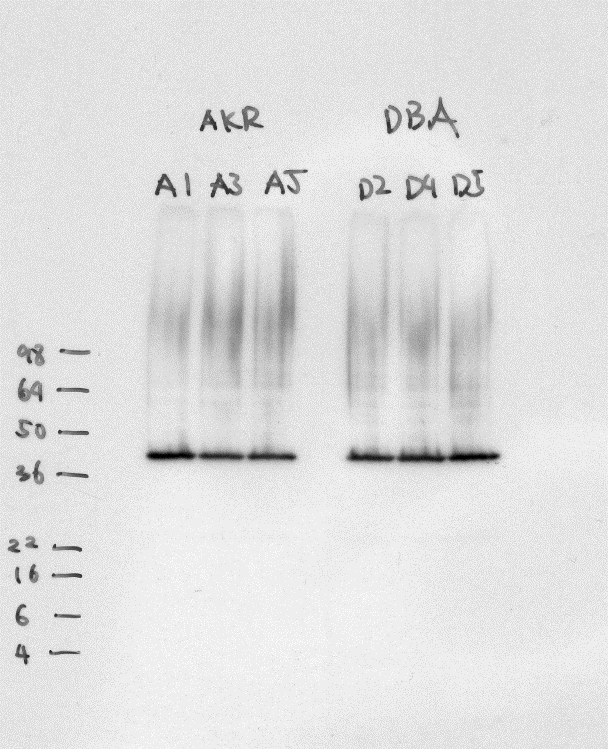

Supplement: data1 [file Figure 2B unedited western blot source data.docx]

Unedited western blots for Figure 5D. . A. ASC western blot. B. -actin western blot.

A.


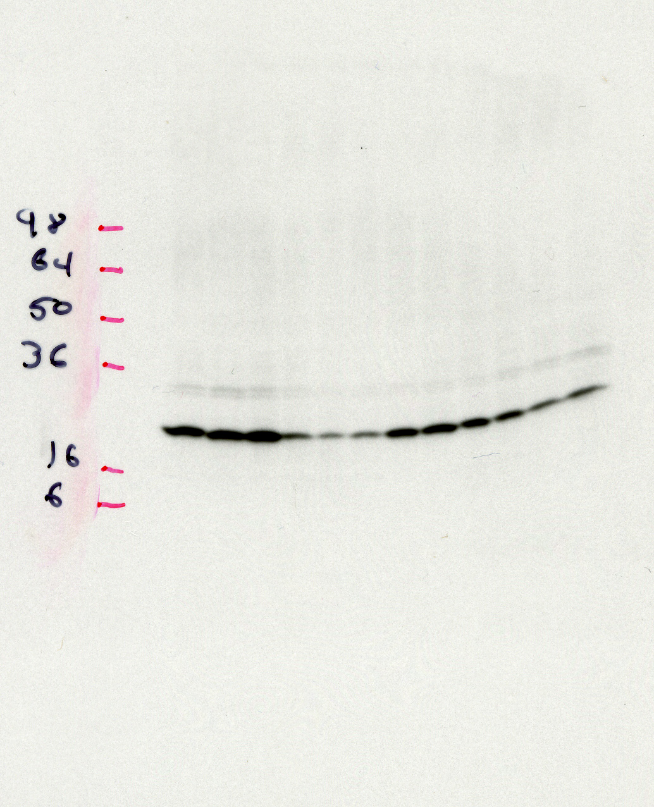


B.


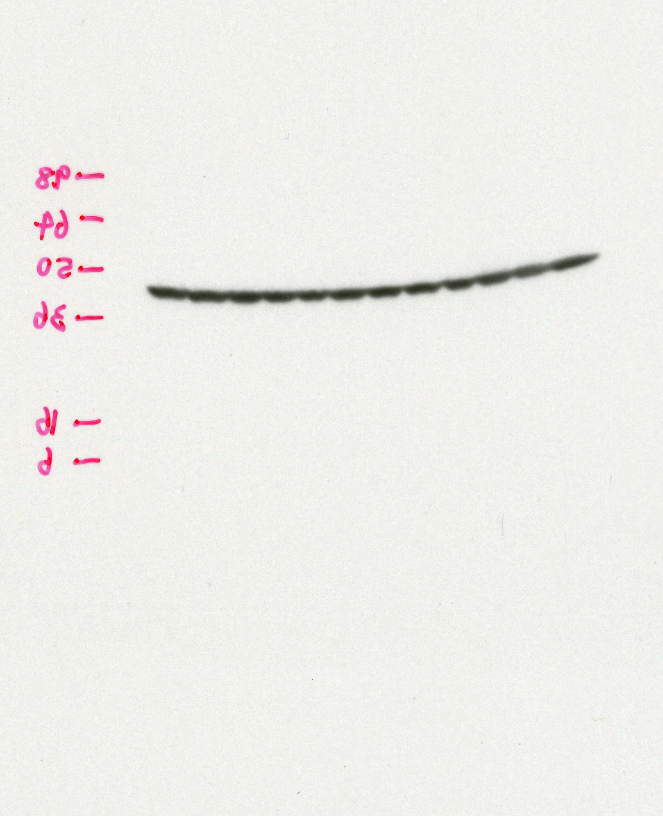

Supplement: data1 [file Figure 5D unedited western blot source data.docx]
